# Supplementary material
Source: Springer Nature journal article supplement (https://www.springermedizin.de/resource/supplementary/12891_2006_254_MOESM1_ESM.pdf/9510864)
Supplement: MOESM1 [file 9510864]

Computer workers (N= ± 8000)

Responded to short  
questionnaire (N=1870)

No response  
(N= ± 6125)

Excluded (N = 1409)

- refused to participate (N = 939)
- did not meet all inclusion criteria (N= 470)

Randomisation (N= 466)

**Intervention  
group 1**  
Work style  
group  
(N=152)

**Intervention  
group 2**  
Work style  
and physical  
activity group  
(N=156)

**Control group**  
(N=158)
